# Supplementary material
Source: PubMed Central journal article supplement (PMC8755980)
Supplement: 253_2021_11722_MOESM1_ESM.pdf [file 253_2021_11722_MOESM1_ESM.pdf]

**Applied Microbiology and Biotechnology**

**Generation and Functional Analysis of Single-chain Variable Fragments (scFvs) Targeting the Nucleocapsid Protein of *Porcine epidemic diarrhea virus***

**Fengqing Wang<sup>1</sup> Man Wang<sup>1</sup> ·Lei Zhang<sup>1</sup> ·Manling Cheng<sup>1</sup> Mei Li<sup>1</sup> Jianguo Zhu<sup>1,\*</sup>**

<sup>1</sup>Shanghai Key Laboratory of Veterinary Biotechnology, School of Agriculture and Biology, Shanghai JiaoTong University, 800 Dongchuan Road, Shanghai 200240, China.

\*Corresponding author:

Jianguo Zhu

E-mail: [zhu\\_jg@sjtu.edu.cn](mailto:zhu_jg@sjtu.edu.cn).

Telephone: 021-34202695(H);021-34204273(O)

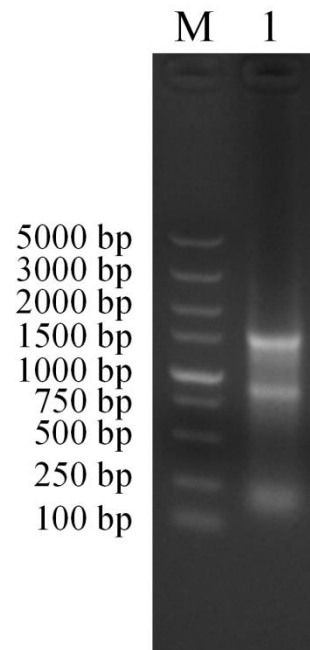

**Fig. S1** Analysis of RNA with gel electrophoresis. Lane M, 5000-bp DNA ladder; lane 1, RNA extracted from the spleens of immunized pigs

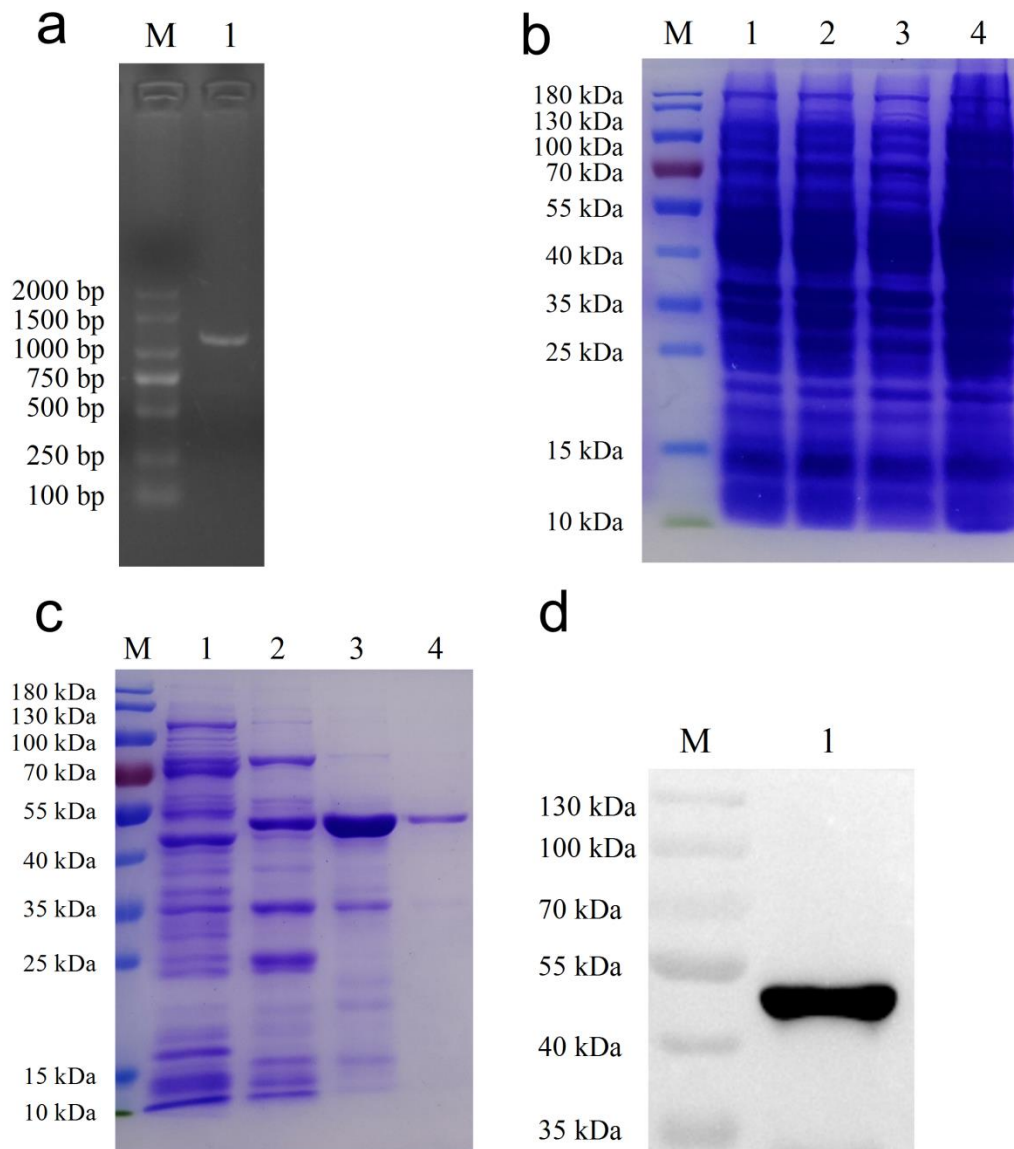

**Fig. S2** Expression and purification of the recombinant TGEV N protein. **a** RT-PCR amplification of CDS region of TGEV N gene. Lane M, 2,000-bp DNA ladder; lane 1, PCR product of TGEV N gene. **b** SDS-PAGE analysis of proteins extracted from bacterial cell lysate. Lane M, protein molecular weight marker; lane 1, total cell lysate of uninduced *E. coli* containing pCold I; lane 2, total cell lysate of induced *E. coli* containing pCold I; lane 3, total cell lysate of uninduced *E. coli* containing pCold I-TGEV-N; lane 4, total cell lysate of induced *E. coli* containing pCold I-TGEV-N. **c** SDS-PAGE analysis of the purified protein. Lanes 1–4, purified TGEV N proteins eluted at different imidazole concentrations (50 mM, 100 mM, 250 mM, 500 mM, respectively). **d** Western blotting analysis of the purified protein. Lane 1, purified TGEV N protein

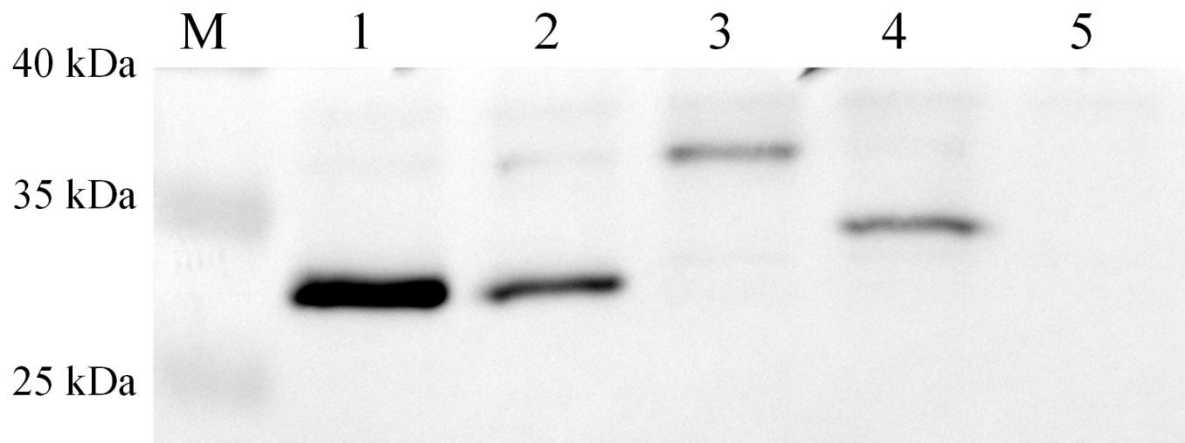

**Fig. S3** Western blotting analysis of cell lysates. Lanes 1–5, lysates of Vero E6 cells transfected with pCMV-HA-ZW1-16, pCMV-HA-ZW3-21, pCMV-HA-ZW1-41, pCMV-HA-ZW4-16, or pCMV-HA, respectively; scFv expression was detected with western blotting

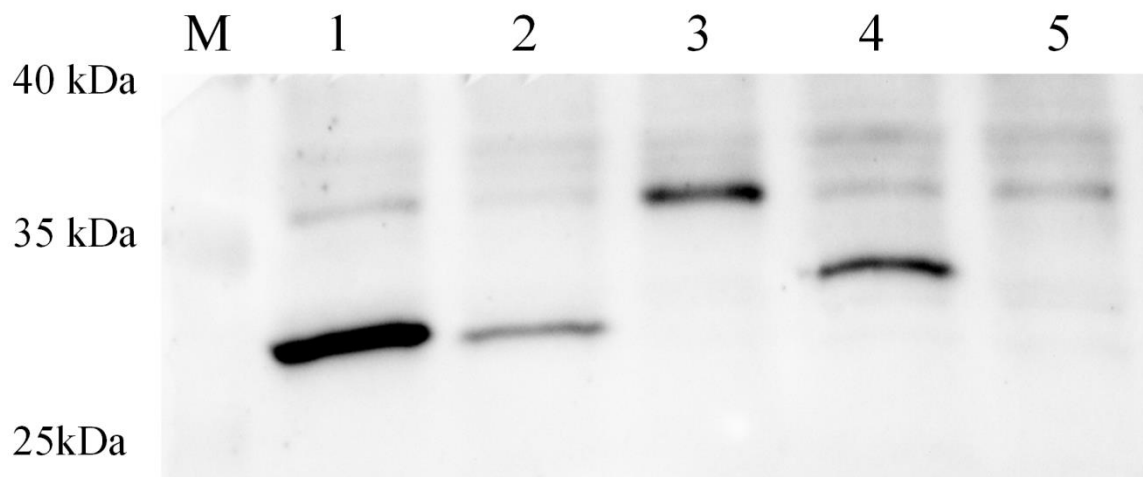

**Fig. S4** Western blotting analysis of cell lysates. Lanes 1-5, lysates of IPEC-J2 cells transfected with pCMV-HA-ZW1-16, pCMV-HA-ZW3-21, pCMV-HA-ZW1-41, pCMV-HA-ZW4-16, or pCMV-HA, respectively; scFv expression was detected with western blotting

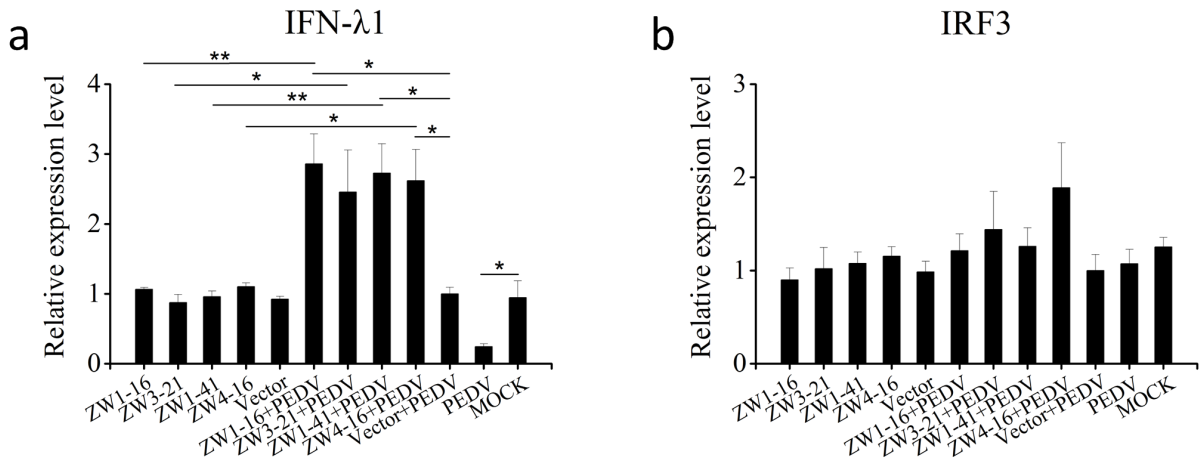

**Fig. S5** Analysis of the relative gene expression of IFN-λ1 and IRF3 by RT-qPCR. IPEC-J2 cells were transfected with pCMV-HA-scFv or pCMV-HA before PEDV infection. Untransfected infected IPEC-J2 cells and transfected uninfected IPEC-J2 cells were used as the control, and untransfected uninfected IPEC-J2 cells were used as the MOCK control. At 12 hpi, total RNA was isolated from the treated cells, and the transcriptional expression of IFN-λ1 and IRF3 was detected with RT-qPCR. The housekeeping gene β-actin was used to normalize the individual samples. Values are the means ± standard errors of the means (mean ± SEM) of three independent experiments. \* $P < 0.05$ , \*\* $P < 0.01$
